# Supplementary Figures and Tables: Leveraging polygenic functional enrichment to improve GWAS power

Gleb Kichaev<sup>1,†</sup>, Gaurav Bhatia<sup>2</sup>, Po-Ru Loh<sup>2,3</sup>, Steven Gazal<sup>2,3</sup>, Kathryn Burch<sup>1</sup>, Malika Freund<sup>4</sup>, Armin Schoech<sup>2,3</sup>, Bogdan Pasaniuc<sup>1,4,5,†,\*</sup>, and Alkes L Price<sup>2,3,6,†,\*</sup>

<sup>1</sup>Interdepartmental Program in Bioinformatics, University of California, Los Angeles, California 90095, USA.

<sup>2</sup>Dept. of Epidemiology, Harvard T. H. Chan School of Public Health, Boston, Massachusetts 02115, USA

<sup>3</sup>Program in Medical and Population Genetics, Broad Institute, Cambridge, Massachusetts 02142, USA

<sup>4</sup>Dept. of Human Genetics, University of California, Los Angeles, California 90095, USA.

<sup>5</sup>Dept. Pathology and Laboratory Medicine, University of California, Los Angeles, California 90095, USA

<sup>6</sup>Dept. of Biostatistics, Harvard T. H. Chan School of Public Health, Boston, Massachusetts 02115, USA

\*These authors jointly supervised this work

†Correspondence should be addressed to G.K. (gkichaev@ucla.edu), B.P. (pasaniuc@ucla.edu) or A.L.P. (aprice@hsph.harvard.edu).

## Figures

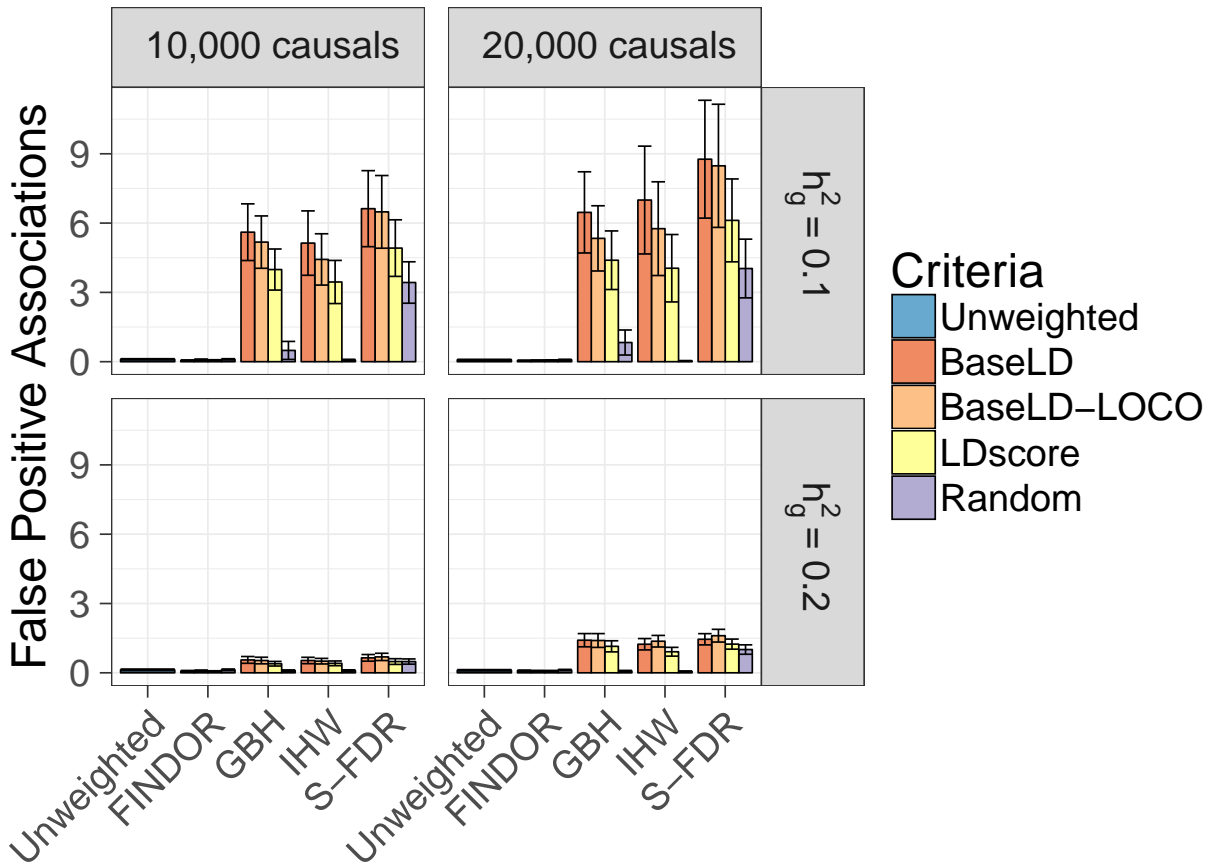

**Supplementary Figure 1: Null mis-calibration for GBH, IHW and S-FDR is worse at lower effective sample size (50K).** We report the average number of independent, genome-wide significant ( $p < 5 \times 10^{-8}$ ) associations on null chromosomes in simulations with 50K individuals (vs. 100K in Figure 1). Results are averaged across 500 simulations. Error bars represent 95% confidence intervals.

# Tables

| Annotation                       | Proportion of SNPs | $h_g^2$ Enrichment | Tau      |
|----------------------------------|--------------------|--------------------|----------|
| All SNPs                         | 1                  | NaN                | -1.011   |
| Coding                           | 0.014              | 4.634              | 1.248    |
| Coding + 500bp                   | 0.064              | 1.523              | -1.303   |
| Conserved (GERP NS)              | -                  | 1.801              | 0.3244   |
| Conserved (GERP RS $\geq 4$ )    | 0.8                | 12.99              | 7.121    |
| Conserved (Lindblad-Toh)         | 0.026              | 9.353              | 6.166    |
| Conserved (Lindblad-Toh) + 500bp | 0.33               | 1.669              | -0.3263  |
| CTCF                             | 0.024              | 0.3465             | -1.074   |
| CTCF + 500bp                     | 0.071              | 0.7298             | -0.3127  |
| DGF                              | 0.136              | 2.062              | 0.1708   |
| DGF + 500bp                      | 0.538              | 1.367              | 0.05873  |
| DHS Peaks                        | 0.111              | 2.272              | 0.08154  |
| DHS                              | 0.166              | 2.017              | -0.5108  |
| DHS + 500bp                      | 0.496              | 1.3                | -0.1541  |
| FANTOM5 Enhancer                 | 0.4                | 1.296              | -1.391   |
| FANTOM5 Enhancer + 500bp         | 0.019              | 1.723              | -0.3048  |
| Enhancer                         | 0.042              | 2.724              | 0.6413   |
| Enhancer + 500bp                 | 0.09               | 2.113              | -0.1927  |
| Fetal DHS                        | 0.084              | 2.493              | 0.1489   |
| Fetal DHS + 500bp                | 0.283              | 1.581              | -0.1934  |
| H3K27ac (Hnisz)                  | 0.389              | 1.526              | -0.4566  |
| H3K27ac (Hnisz) + 500bp          | 0.42               | 1.534              | 0.5073   |
| H3K27ac (PGC2)                   | 0.269              | 1.716              | -0.546   |
| H3K27ac (PGC2) + 500bp           | 0.335              | 1.708              | 0.5095   |
| H3K4me1 Peaks                    | 0.17               | 2.254              | 0.5072   |
| H3K4me1                          | 0.424              | 1.71               | 0.5112   |
| H3K4me1 + 500bp                  | 0.606              | 1.338              | -0.2583  |
| H3K4me3 Peaks                    | 0.042              | 2.936              | 0.3316   |
| H3K4me3                          | 0.133              | 2.378              | 0.3035   |
| H3K4me3 + 500bp                  | 0.255              | 1.756              | -0.08552 |
| H3K9ac Peaks                     | 0.038              | 3.261              | 0.5507   |
| H3K9ac                           | 0.125              | 2.592              | 0.6866   |
| H3K9ac + 500bp                   | 0.23               | 1.915              | -0.232   |
| Intron                           | 0.387              | 1.11               | 2.252    |
| Intron + 500bp                   | 0.397              | 1.177              | -2.379   |
| Promoter Flanking                | 0.8                | 1.797              | -0.06156 |
| Promoter Flanking + 500bp        | 0.033              | 1.373              | -0.8093  |
| Promoter                         | 0.031              | 1.961              | 1.882    |
| Promoter + 500bp                 | 0.038              | 1.5                | -2.017   |
| Repressed                        | 0.461              | 0.7185             | 0.05893  |
| Repressed + 500bp                | 0.719              | 0.7835             | 0.1844   |
| Super Enhancer (Vahedi)          | 0.021              | 2.076              | 2.19     |
| Super Enhancer (Vahedi) + 500bp  | 0.021              | 2.017              | -2.265   |
| Super Enhancer (Hnisz)           | 0.167              | 1.814              | -1.809   |
| Super Enhancer (Hnisz) + 500bp   | 0.17               | 1.878              | 1.835    |
| Typical Enhancer                 | 0.022              | 1.698              | 0.995    |
| Typical Enhancer + 500bp         | 0.026              | 1.653              | -0.9213  |
| TFBS                             | 0.131              | 2.439              | 0.9492   |
| TFBS + 500bp                     | 0.341              | 1.499              | -0.1196  |
| Transcribed                      | 0.346              | 1.173              | 0.309    |
| Transcribed + 500bp              | 0.762              | 0.965              | -0.09606 |
| TSS                              | 0.018              | 3.469              | 0.7095   |
| TSS + 500bp                      | 0.034              | 2.916              | 0.1618   |
| 3 UTR                            | 0.011              | 2.905              | 0.3657   |
| 3 UTR + 500bp                    | 0.026              | 1.991              | -0.04583 |
| 5 UTR                            | 0.5                | 3.271              | 0.6998   |
| 5 UTR + 500bp                    | 0.027              | 1.581              | -0.3904  |
| Weak Enhancer                    | 0.021              | 1.69               | -0.4957  |
| Weak Enhancer + 500bp            | 0.089              | 1.41               | -0.4051  |
| MAF bin 1                        | 0.102              | 0.6522             | 0.5037   |
| MAF bin 2                        | 0.1                | 0.7087             | 0.5734   |
| MAF bin 3                        | 0.1                | 0.8438             | 0.7306   |
| MAF bin 4                        | 0.101              | 0.7483             | 0.6469   |
| MAF bin 5                        | 0.098              | 0.9875             | 0.9017   |
| MAF bin 6                        | 0.1                | 1.088              | 0.985    |
| MAF bin 7                        | 0.1                | 1.093              | 1.028    |
| MAF bin 8                        | 0.1                | 1.168              | 1.102    |
| MAF bin 9                        | 0.101              | 1.18               | 1.109    |
| MAF bin 10                       | 0.098              | 1.291              | 1.222    |
| MAF-Adjusted Allele Age          | -                  | NA                 | -0.2584  |
| LLD-AFR                          | -                  | NA                 | -0.2012  |
| Recombination Rate (10kb)        | -                  | 0.891              | -0.08077 |
| Nucleotide Diversity (10kb)      | -                  | 0.8324             | -0.05295 |
| Background Selection Statistic   | -                  | 1.238              | 0.6152   |
| CpG-Content (50kb)               | -                  | 1.162              | 41.6     |

| $h_g^2$ | # Causals | Criteria    | FINDOR         | GBH            | IHW            | S-FDR          | Unweighted     |
|---------|-----------|-------------|----------------|----------------|----------------|----------------|----------------|
| 0.1     | 10,000    | BaseLD      | 0.066 (0.0086) | 0.4 (0.035)    | 0.38 (0.031)   | 0.47 (0.035)   | NA             |
|         |           | BaseLD-LOCO | 0.073 (0.009)  | 0.37 (0.033)   | 0.36 (0.033)   | 0.48 (0.035)   | NA             |
|         |           | LDscore     | 0.07 (0.0087)  | 0.29 (0.03)    | 0.29 (0.024)   | 0.4 (0.029)    | NA             |
|         |           | Random      | 0.11 (0.011)   | 0.072 (0.0088) | 0.071 (0.0089) | 0.37 (0.029)   | NA             |
|         |           | Unweighted  | NA             | NA             | NA             | NA             | 0.091 (0.0099) |
| 0.1     | 20,000    | BaseLD      | 0.061 (0.013)  | 1.6 (0.24)     | 1.3 (0.18)     | 1.7 (0.21)     | NA             |
|         |           | BaseLD-LOCO | 0.073 (0.014)  | 1.6 (0.25)     | 1.5 (0.22)     | 1.8 (0.23)     | NA             |
|         |           | LDscore     | 0.066 (0.012)  | 1.2 (0.19)     | 1.1 (0.16)     | 1.4 (0.21)     | NA             |
|         |           | Random      | 0.1 (0.016)    | 0.086 (0.015)  | 0.076 (0.014)  | 1.2 (0.16)     | NA             |
|         |           | Unweighted  | NA             | NA             | NA             | NA             | 0.1 (0.016)    |
| 0.2     | 10,000    | BaseLD      | 0.06 (0.008)   | 0.067 (0.0084) | 0.051 (0.0075) | 0.066 (0.0082) | NA             |
|         |           | BaseLD-LOCO | 0.058 (0.0079) | 0.062 (0.0081) | 0.058 (0.0077) | 0.068 (0.0085) | NA             |
|         |           | LDscore     | 0.064 (0.0081) | 0.055 (0.0078) | 0.048 (0.0071) | 0.059 (0.0078) | NA             |
|         |           | Random      | 0.093 (0.0099) | 0.081 (0.0092) | 0.081 (0.0092) | 0.096 (0.01)   | NA             |
|         |           | Unweighted  | NA             | NA             | NA             | NA             | 0.09 (0.0096)  |
| 0.2     | 20,000    | BaseLD      | 0.059 (0.0076) | 0.081 (0.0093) | 0.064 (0.0083) | 0.09 (0.01)    | NA             |
|         |           | BaseLD-LOCO | 0.063 (0.008)  | 0.081 (0.0091) | 0.075 (0.0093) | 0.093 (0.01)   | NA             |
|         |           | LDscore     | 0.055 (0.0073) | 0.061 (0.008)  | 0.042 (0.0065) | 0.069 (0.0084) | NA             |
|         |           | Random      | 0.097 (0.0098) | 0.087 (0.0092) | 0.089 (0.0094) | 0.12 (0.011)   | NA             |
|         |           | Unweighted  | NA             | NA             | NA             | NA             | 0.098 (0.0098) |

**Supplementary Table 2: Numerical results for simulations of null loci (Figure 1).** We report the average number of independent, genome-wide significant ( $p < 5 \times 10^{-8}$ ) associations on null chromosomes. Results are averaged across 1000 simulations. Standard errors are reported in parentheses.

| $h_g^2$ | # Causals | log10 threshold | BaseLD          | BaseLD (LOCO)   | LDscore         | Random          | Unweighted      |
|---------|-----------|-----------------|-----------------|-----------------|-----------------|-----------------|-----------------|
| 0.1     | 10000     | -8              | 1.07 (0.79)     | 0.96 (0.74)     | 0.89 (0.68)     | 0.52 (0.32)     | 0.51 (0.32)     |
|         |           | -7              | 3.9 (1.14)      | 3.99 (1.05)     | 3.66 (1.03)     | 3.45 (0.8)      | 3.49 (0.82)     |
|         |           | -6              | 27.77 (1.77)    | 28.27 (1.72)    | 25.91 (1.61)    | 26.16 (1.34)    | 26.27 (1.35)    |
|         |           | -5              | 257.06 (4.68)   | 260.59 (4.47)   | 246.15 (4.18)   | 243.82 (2.94)   | 244.22 (2.98)   |
|         |           | -4              | 2497.25 (16.01) | 2534.26 (15.07) | 2471.05 (15.68) | 2425.97 (9.73)  | 2421.79 (9.93)  |
| 0.1     | 20000     | -8              | 0.23 (0.08)     | 0.26 (0.08)     | 0.29 (0.09)     | 0.29 (0.08)     | 0.26 (0.07)     |
|         |           | -7              | 2.22 (0.35)     | 2.12 (0.31)     | 2.02 (0.31)     | 2.48 (0.28)     | 2.45 (0.28)     |
|         |           | -6              | 25.41 (1.73)    | 25.34 (1.67)    | 23.31 (1.43)    | 23.86 (1.07)    | 24.01 (1.1)     |
|         |           | -5              | 253.37 (6.05)   | 258.33 (6)      | 239.84 (5.62)   | 241.9 (3.75)    | 241.82 (3.8)    |
|         |           | -4              | 2505.8 (25.29)  | 2552.36 (24.37) | 2450.59 (23.69) | 2429.73 (15.65) | 2424.49 (15.96) |
| 0.2     | 10000     | -8              | 0.57 (0.25)     | 0.59 (0.26)     | 0.51 (0.26)     | 0.33 (0.09)     | 0.31 (0.08)     |
|         |           | -7              | 2.89 (0.4)      | 2.81 (0.4)      | 2.57 (0.39)     | 2.67 (0.35)     | 2.65 (0.35)     |
|         |           | -6              | 27.3 (1.85)     | 27.16 (1.64)    | 26.69 (1.92)    | 24.99 (0.81)    | 25.05 (0.82)    |
|         |           | -5              | 253.01 (4.7)    | 258.05 (4.63)   | 260.4 (5)       | 247.23 (2.89)   | 247.72 (2.93)   |
|         |           | -4              | 2433.43 (14.02) | 2485.62 (13.81) | 2467.72 (14.75) | 2444.87 (10.06) | 2439.6 (10.15)  |
| 0.2     | 20000     | -8              | 0.24 (0.06)     | 0.25 (0.06)     | 0.2 (0.06)      | 0.22 (0.05)     | 0.22 (0.05)     |
|         |           | -7              | 2.13 (0.23)     | 2.25 (0.24)     | 2.15 (0.2)      | 2.29 (0.17)     | 2.31 (0.18)     |
|         |           | -6              | 24.09 (1.01)    | 24.73 (0.99)    | 24.37 (1.03)    | 24.28 (0.69)    | 24.36 (0.71)    |
|         |           | -5              | 241.74 (3.9)    | 249.05 (3.76)   | 246.46 (4.15)   | 245.44 (2.67)   | 246.35 (2.71)   |
|         |           | -4              | 2414.67 (14.36) | 2468.78 (13.93) | 2468.45 (14.56) | 2431.91 (9.74)  | 2426.62 (9.81)  |

**Supplementary Table 3: FINDOR is well-calibrated at less stringent significance thresholds in simulations of null loci.** We report the average *total number of associated SNPs* on null chromosomes at various significance thresholds. (In contrast to our main simulations, we do not report the average number of independent associations, due to problems with clumping using PLINK at less significant thresholds.) Results are averaged across 1000 simulations. Standard errors are reported in parentheses.

| $h_g^2$ | # Causals | Criteria   | FINDOR       | Unweighted   | % Improve |
|---------|-----------|------------|--------------|--------------|-----------|
| 0.1     | 10,000    | Baseline   | 8.92 (0.1)   | NA           | 20.00     |
|         |           | BaseLD     | 9.15 (0.1)   | NA           | 23.00     |
|         |           | LDscore    | 7.95 (0.095) | NA           | 6.90      |
|         |           | Random     | 7.59 (0.092) | NA           | 2.00      |
|         |           | Unweighted | NA           | 7.44 (0.092) | 0         |
| 0.1     | 20,000    | Baseline   | 5.28 (0.12)  | NA           | 34.00     |
|         |           | BaseLD     | 5.45 (0.12)  | NA           | 38.00     |
|         |           | LDscore    | 4.5 (0.11)   | NA           | 14.00     |
|         |           | Random     | 4.02 (0.1)   | NA           | 2.00      |
|         |           | Unweighted | NA           | 3.94 (0.1)   | 0         |
| 0.2     | 10,000    | Baseline   | 55.4 (0.23)  | NA           | 6.70      |
|         |           | BaseLD     | 56.4 (0.23)  | NA           | 8.70      |
|         |           | LDscore    | 52.2 (0.23)  | NA           | 0.58      |
|         |           | Random     | 52.3 (0.23)  | NA           | 0.77      |
|         |           | Unweighted | NA           | 51.9 (0.23)  | 0         |
| 0.2     | 20,000    | Baseline   | 31.5 (0.16)  | NA           | 16.00     |
|         |           | BaseLD     | 32.3 (0.17)  | NA           | 19.00     |
|         |           | LDscore    | 29.1 (0.16)  | NA           | 7.00      |
|         |           | Random     | 27.4 (0.16)  | NA           | 0.74      |
|         |           | Unweighted | NA           | 27.2 (0.15)  | 0         |

**Supplementary Table 4: Numerical results for simulations of causal loci (Figure 2).** We report the average number of independent, genome-wide significant ( $p < 5 \times 10^{-8}$ ) associations on causal chromosomes. Results are averaged across 1000 simulations. Standard errors are reported in parentheses.

| Trait                             | Baseline | BaseLD | LDscore | Random | Unweighted |
|-----------------------------------|----------|--------|---------|--------|------------|
| Eosinophil Count                  | 198      | 200    | 189     | 188    | 187        |
| Mean Corpular Hemoglobin          | 247      | 248    | 233     | 237    | 237        |
| Red Blood Cell Distribution Width | 205      | 212    | 201     | 199    | 198        |
| Red Blood Cell Count              | 201      | 206    | 191     | 192    | 192        |
| White Blood Cell Count            | 158      | 165    | 148     | 148    | 148        |
| Heel T Score                      | 308      | 308    | 295     | 302    | 300        |
| Balding Type I                    | 96       | 100    | 92      | 96     | 96         |
| Body Mass Index                   | 126      | 132    | 119     | 117    | 117        |
| Height                            | 685      | 690    | 668     | 675    | 674        |
| Waist-hip Ratio                   | 102      | 104    | 100     | 99     | 98         |
| Systolic Blood Pressure           | 105      | 106    | 98      | 96     | 98         |
| Years of Education                | 19       | 24     | 18      | 17     | 17         |
| Smoking Status                    | 22       | 24     | 21      | 19     | 18         |
| Auto Immune Traits                | 15       | 18     | 14      | 14     | 14         |
| Eczema                            | 43       | 46     | 39      | 34     | 35         |
| Cardiovascular Diseases           | 47       | 49     | 39      | 41     | 38         |
| Hypothyroidism                    | 27       | 30     | 27      | 27     | 27         |
| Respiratory and Disease           | 26       | 29     | 24      | 25     | 24         |
| Type 2 Diabetes                   | 16       | 14     | 13      | 15     | 14         |
| FEV1-FVC Ratio                    | 178      | 185    | 172     | 174    | 174        |
| Forced Vital Capacity (FVC)       | 99       | 99     | 94      | 91     | 90         |
| Neuroticism                       | 15       | 16     | 10      | 11     | 11         |
| Morning Person                    | 12       | 14     | 13      | 14     | 14         |
| Hair Color                        | 142      | 143    | 139     | 139    | 140        |
| Sunburn Occasion                  | 24       | 25     | 23      | 22     | 23         |
| Age at Menarche                   | 56       | 56     | 54      | 52     | 52         |
| Age at Menopause                  | 17       | 18     | 17      | 17     | 18         |
| Total                             | 3189     | 3261   | 3051    | 3061   | 3054       |
| Difference                        | 135      | 207    | -3      | 7      | 0          |
| Jackknife SE                      | 17.22    | 20.41  | 14.56   | 5.88   | 0          |

**Supplementary Table 5: Results for FINDOR with different stratification criteria in the 145K UK Biobank release.** For each trait, we report the number of independent, genome-wide significant loci identified by the Unweighted approach and by FINDOR with various stratification criteria in the 145K UK Biobank release.

**Supplementary Table 6: List of independent, genome-wide significant loci for all 27 traits in 145K and 460K UK Biobank releases.** We report independent, genome-wide significant loci for both Unweighted and FINDOR. See Excel file.



| Class          | 145K              |               |                    |                    | 459K              |               |                     |                    |
|----------------|-------------------|---------------|--------------------|--------------------|-------------------|---------------|---------------------|--------------------|
|                | # Loci Unweighted | # Loci FINDOR | Overall % Increase | Average % Increase | # Loci Unweighted | # Loci FINDOR | Overall % Increase. | Average % Increase |
| Anthropometric | 1285              | 1334          | 4%                 | 6%                 | 5227              | 5353          | 2%                  | 4%                 |
| Blood Cell     | 962               | 1031          | 7%                 | 8%                 | 3669              | 3831          | 4%                  | 4%                 |
| Disease        | 152               | 186           | 22%                | 20%                | 860               | 946           | 10%                 | 10%                |
| Other          | 655               | 710           | 8%                 | 15%                | 3527              | 3736          | 6%                  | 7%                 |
| Overall        | 3054              | 3261          | 7%                 | 13%                | 13283             | 13866         | 4%                  | 7%                 |

**Supplementary Table 7: Results for each phenotype class in 145K and 459K UK Biobank releases.** For each phenotype class, we report the number of independent, genome-wide significant loci identified by the Unweighted approach and by FINDOR in the 145K and 459K UK Biobank releases.

| Trait                             | Baseline | BaseLD | LDscore | Random | Unweighted |
|-----------------------------------|----------|--------|---------|--------|------------|
| Eosinophil Count                  | 166      | 164    | 157     | 159    | 159        |
| Mean Corpular Hemoglobin          | 209      | 210    | 200     | 203    | 203        |
| Red Blood Cell Distribution Width | 165      | 170    | 159     | 160    | 160        |
| Red Blood Cell Count              | 164      | 167    | 153     | 153    | 154        |
| White Blood Cell Count            | 119      | 120    | 112     | 114    | 112        |
| Heel T Score                      | 244      | 250    | 238     | 240    | 239        |
| Balding Type I                    | 79       | 83     | 75      | 75     | 76         |
| Body Mass Index                   | 79       | 82     | 76      | 78     | 78         |
| Height                            | 563      | 568    | 539     | 538    | 538        |
| Waist-hip Ratio                   | 79       | 75     | 74      | 71     | 70         |
| Systolic Blood Pressure           | 75       | 75     | 73      | 73     | 71         |
| Years of Education                | 10       | 11     | 10      | 10     | 10         |
| Smoking Status                    | 11       | 13     | 8       | 7      | 7          |
| Auto Immune Traits                | 11       | 11     | 10      | 9      | 10         |
| Eczema                            | 27       | 28     | 27      | 24     | 24         |
| Cardiovascular Diseases           | 30       | 30     | 29      | 28     | 29         |
| Hypothyroidism                    | 22       | 23     | 23      | 23     | 24         |
| Respiratory and Disease           | 21       | 22     | 18      | 20     | 19         |
| Type 2 Diabetes                   | 9        | 9      | 7       | 10     | 10         |
| FEV1-FVC Ratio                    | 135      | 138    | 131     | 134    | 134        |
| Forced Vital Capacity (FVC)       | 62       | 63     | 58      | 57     | 57         |
| Neuroticism                       | 5        | 8      | 5       | 5      | 5          |
| Morning Person                    | 6        | 5      | 5       | 5      | 5          |
| Hair Color                        | 117      | 122    | 119     | 121    | 121        |
| Sunburn Occasion                  | 20       | 20     | 18      | 18     | 18         |
| Age at Menarche                   | 39       | 39     | 37      | 39     | 38         |
| Age at Menopause                  | 14       | 14     | 13      | 14     | 14         |
| Total                             | 2545     | 2582   | 2438    | 2452   | 2450       |
| Difference                        | 95       | 132    | -12     | 2      | 0          |
| Jackknife SE                      | 15.83    | 16.72  | 10.14   | 5.28   | 0          |

**Supplementary Table 8: Results for FINDOR with different stratification criteria with p-value threshold of  $5 \times 10^{-9}$  in the 145K UK Biobank release.** For each trait, we report the number of independent,  $p < 5 \times 10^{-9}$  loci identified by the Unweighted approach and by FINDOR with various stratification criteria in the 145K UK Biobank release.

|              | Estimate | Std. Error | t value | Pr(> t )              |
|--------------|----------|------------|---------|-----------------------|
| (Intercept)  | -0.0000  | 0.0001     | -0.46   | 0.6468                |
| Both Methods | 0.9114   | 0.0039     | 234.92  | $< 1 \times 10^{-20}$ |

  

|             | Estimate | Std. Error | t value | Pr(> t )              |
|-------------|----------|------------|---------|-----------------------|
| (Intercept) | -0.0005  | 0.0003     | -1.83   | 0.0685                |
| FINDOR only | 0.6613   | 0.0179     | 37.04   | $< 1 \times 10^{-20}$ |

  

|                 | Estimate | Std. Error | t value | Pr(> t )              |
|-----------------|----------|------------|---------|-----------------------|
| (Intercept)     | -0.0015  | 0.0007     | -2.30   | 0.0262                |
| Unweighted Only | 0.5724   | 0.0427     | 13.42   | $< 1 \times 10^{-20}$ |

**Supplementary Table 9: Numerical results for UK Biobank replication analysis (Figure 4, left panel).** For loci detected using Both Methods, FINDOR only, or Unweighted only, respectively, we report results of a regression of standardized effect sizes ( $\frac{Z}{\sqrt{N}}$ ) at lead SNPs in UK Biobank replication data vs. UK Biobank discovery data.

| Phenotype        | Replication Study                                      | Discovery N | Replication N (max) |
|------------------|--------------------------------------------------------|-------------|---------------------|
| BMI              | Locke et al. (Nature 2015) <sup>2</sup>                | 145,209     | 322,091             |
| Height           | Wood et al. (Nature 2014) <sup>3</sup>                 | 145,368     | 253,237             |
| WHR adjusted BMI | Shugin et al (Nature 2015) <sup>4</sup>                | 145,375     | 210,039             |
| Edu Years        | Rietveld et al. (Science 2013) <sup>5</sup>            | 144,204     | 126,559             |
| Eczema           | Paternoster et al. (Nature Genetics 2015) <sup>6</sup> | 145,416     | 40,835              |
| Type II Diabetes | Morris et al. (Nature Genetics 2012) <sup>7</sup>      | 145,298     | 29,842              |
| Ever Smoked      | Furberg et al. (Nature Genetics 2010) <sup>8</sup>     | 145,227     | 74,035              |
| Age at Menarche  | Perry et al. (Nature 2014) <sup>9</sup>                | 74,944      | 182,416             |
| Age at Menopause | Day et al (Nature Genetics 2015) <sup>10</sup>         | 44,410      | 69,360              |

**Supplementary Table 10: List of nine traits used for non-UK Biobank replication analysis.** We report the non-UK Biobank replication reference, UK Biobank discovery sample size and non-UK Biobank replication sample size for each trait.

|              | Estimate | Std. Error | t value | Pr(> t )              |
|--------------|----------|------------|---------|-----------------------|
| (Intercept)  | -0.0001  | 0.0003     | -0.39   | 0.6970                |
| Both Methods | 0.6717   | 0.0126     | 53.39   | $< 1 \times 10^{-20}$ |

  

|             | Estimate | Std. Error | t value | Pr(> t )              |
|-------------|----------|------------|---------|-----------------------|
| (Intercept) | -0.0006  | 0.0015     | -0.38   | 0.7054                |
| FINDOR only | 0.6884   | 0.1021     | 6.74    | $9.52 \times 10^{-8}$ |

**Supplementary Table 11: Numerical results for non-UK Biobank replication analysis (Figure 4, right panel).** For loci detected using Both Methods or FINDOR only, respectively, we report results of a regression of standardized effect sizes ( $\frac{Z}{\sqrt{N}}$ ) at lead SNPs in non-UK Biobank replication data vs. UK Biobank discovery data. We do not report results for Unweighted only, which contained only a single locus.

| Trait                             | Baseline | BaseLD | LDscore | Random | Unweighted |
|-----------------------------------|----------|--------|---------|--------|------------|
| Eosinophil Count                  | 710      | 731    | 686     | 700    | 699        |
| Mean Corpular Hemoglobin          | 791      | 791    | 758     | 766    | 765        |
| Red Blood Cell Distribution Width | 677      | 674    | 641     | 651    | 652        |
| Red Blood Cell Count              | 878      | 885    | 834     | 839    | 840        |
| White Blood Cell Count            | 744      | 750    | 710     | 713    | 713        |
| Heel T Score                      | 1148     | 1149   | 1113    | 1127   | 1130       |
| Balding Type I                    | 346      | 346    | 335     | 335    | 334        |
| Body Mass Index                   | 930      | 950    | 913     | 907    | 908        |
| Height                            | 2397     | 2402   | 2354    | 2395   | 2395       |
| Waist-hip Ratio                   | 496      | 506    | 472     | 458    | 460        |
| Systolic Blood Pressure           | 694      | 703    | 661     | 664    | 666        |
| Years of Education                | 302      | 315    | 293     | 287    | 286        |
| Smoking Status                    | 169      | 178    | 164     | 154    | 154        |
| Auto Immune Traits                | 84       | 86     | 72      | 75     | 75         |
| Eczema                            | 191      | 198    | 179     | 182    | 181        |
| Cardiovascular Diseases           | 304      | 314    | 286     | 285    | 285        |
| Hypothyroidism                    | 151      | 153    | 141     | 140    | 139        |
| Respiratory and Disease           | 108      | 109    | 98      | 105    | 104        |
| Type 2 Diabetes                   | 87       | 86     | 80      | 78     | 76         |
| FEV1-FVC Ratio                    | 703      | 714    | 684     | 684    | 684        |
| Forced Vital Capacity (FVC)       | 559      | 565    | 541     | 543    | 544        |
| Neuroticism                       | 143      | 149    | 136     | 128    | 128        |
| Morning Person                    | 161      | 165    | 159     | 156    | 156        |
| Hair Color                        | 433      | 436    | 427     | 429    | 428        |
| Sunburn Occasion                  | 82       | 82     | 74      | 79     | 78         |
| Age at Menarche                   | 326      | 338    | 318     | 318    | 318        |
| Age at Menopause                  | 89       | 91     | 85      | 86     | 85         |
| Total                             | 13703    | 13866  | 13214   | 13284  | 13283      |
| Difference                        | 420      | 583    | -69     | 1      | 0          |
| Jackknife SE                      | 39.95    | 40.64  | 33.81   | 10.02  | 0          |

**Supplementary Table 12: Results for FINDOR with different stratification criteria in the 459K UK Biobank release.** For each trait, we report the number of independent, genome-wide significant loci identified by the Unweighted approach and by FINDOR with various stratification criteria in the 459K UK Biobank release.

|      |                 | % of lead SNPs within 95% credible set |              |                   |
|------|-----------------|----------------------------------------|--------------|-------------------|
| Data | Method          | GTE <sub>x</sub> _GE                   | BLUEPRINT_GE | BLUEPRINT_H3K27ac |
| 145K | FINDOR-only     | 17.6% (2.4%)                           | 10.2% (1.9%) | 21.2% (2.6%)      |
|      | Unweighted-only | 0.0% (0.0%)                            | 0.0% (0.0%)  | 2.0% (1.9%)       |
| 459K | FINDOR-only     | 13.6% (1.2%)                           | 7.1% (0.9%)  | 23.4% (1.5%)      |
|      | Unweighted-only | 5.4% (1.7%)                            | 3.0% (1.3%)  | 10.7% (2.4%)      |

  

|      |                 | Average Posterior Probability |               |                   |
|------|-----------------|-------------------------------|---------------|-------------------|
| Data | Method          | GTE <sub>x</sub> _GE          | BLUEPRINT_GE  | BLUEPRINT_H3K27ac |
| 145K | FINDOR-only     | 0.052 (0.012)                 | 0.029 (0.009) | 0.039 (0.009)     |
|      | Unweighted-only | 0 (0)                         | 0 (0)         | 0.015 (0.015)     |
| 459K | FINDOR-only     | 0.037 (0.006)                 | 0.025 (0.005) | 0.055 (0.006)     |
|      | Unweighted-only | 0.025 (0.011)                 | 0.008 (0.006) | 0.032 (0.011)     |

**Supplementary Table 13: Novel loci identified by FINDOR are more likely to be molecular QTL.** Top panel: for lead SNPs at loci detected using FINDOR only or Unweighted only, in both 145K and 459K UK Biobank releases, we report the % of lead SNPs that lie inside 95% causal sets for three molecular QTL, as described in ref.<sup>11</sup>. Bottom panel: for lead SNPs at loci detected using FINDOR only or Unweighted only, in both 145K and 459K UK Biobank releases, we report the average causal posterior probabilities for three molecular QTL, as described in ref.<sup>11</sup>.

## References

1. Steven Gazal, Hilary K Finucane, Nicholas A Furlotte, Po-Ru Loh, Pier Francesco Palamara, Xuanyao Liu, Armin Schoech, Brendan Bulik-Sullivan, Benjamin M Neale, Alexander Gusev, et al. Linkage disequilibrium-dependent architecture of human complex traits shows action of negative selection. *Nature Genetics*, 49(10):1421–1427, 2017.
2. Adam E Locke, Bratati Kahali, Sonja I Berndt, Anne E Justice, Tune H Pers, Felix R Day, Corey Powell, Sailaja Vedantam, Martin L Buchkovich, Jian Yang, et al. Genetic studies of body mass index yield new insights for obesity biology. *Nature*, 518(7538):197–206, 2015.
3. Andrew R Wood, Tonu Esko, Jian Yang, Sailaja Vedantam, Tune H Pers, Stefan Gustafsson, Audrey Y Chu, Karol Estrada, Jian'an Luan, Zoltán Kutalik, et al. Defining the role of common variation in the genomic and biological architecture of adult human height. *Nature genetics*, 46(11):1173–1186, 2014.
4. Dmitry Shungin, Thomas W Winkler, Damien C Croteau-Chonka, Teresa Ferreira, Adam E Locke, Reedik Mägi, Rona J Strawbridge, Tune H Pers, Krista Fischer, Anne E Justice, et al. New genetic loci link adipose and insulin biology to body fat distribution. *Nature*, 518(7538):187–196, 2015.
5. Cornelius A Rietveld, Sarah E Medland, Jaime Derringer, Jian Yang, Tõnu Esko, Nicolas W Martin, Harm-Jan Westra, Konstantin Shakhbazov, Abdel Abdellaoui, Arpana Agrawal, et al. Gwas of 126,559 individuals identifies genetic variants associated with educational attainment. *science*, 340(6139):1467–1471, 2013.
6. Lavinia Paternoster, Marie Standl, Johannes Waage, Hansjörg Baurecht, Melanie Hotze, David P Strachan, John A Curtin, Klaus Bønnelykke, Chao Tian, Atsushi Takahashi, et al. Multi-ethnic genome-wide association study of 21,000 cases and 95,000 controls identifies new risk loci for atopic dermatitis. *Nature genetics*, 47(12):1449, 2015.
7. AP Morris, BF Voight, TM Teslovich, T Ferreira, AV Segre, V Steinthorsdottir, RJ Strawbridge, H Khan, H Grallert, A Mahajan, I Prokopenko, HM Kang, C Dina, T Esko, RM Fraser, S Kanoni, A Kumar, V Lagou, C Langenberg, J Luan, CM Lindgren, M Muller-Nurasyid, S Pechlivanis, NW Rayner, LJ Scott, S Wiltshire, L Yengo, L Kinnunen, EJ Rossin, S Raychaudhuri, AD Johnson, AS Dimas, RJ Loos, S Vedantam, H Chen, JC Florez, C Fox, CT Liu, D Rybin, DJ Couper, WH Kao, M Li, MC Cornelis, P Kraft, Q Sun, RM van Dam, HM Stringham, PS Chines, K Fischer, P Fontanillas, OL Holmen, SE Hunt, AU Jackson, A Kong, R Lawrence, J Meyer, JR Perry, CG Platou, S Potter, E Rehnberg, N Robertson, S Sivapalaratnam, A Stancakova, K Stirrups, G Thorleifsson, E Tikkanen, AR Wood, P Almgren, M Atalay, R Benediktsson, LL Bonnycastle, N Burt, J Carey, G Charpentier, AT Crenshaw, AS Doney, M Dorkhan, S Edkins, V Emilsson, E Eury, T Forsen, K Gertow, B Gigante, GB Grant, CJ Groves, C Guiducci, C Herder, AB Hreidarsson, J Hui, A James, A Jonsson, W Rathmann, N Klopp, J Kravic, K Krjutskov, C Langford, K Leander, E Lindholm, S Lobbens, S Mannisto, G Mirza, TW Muhleisen, B Musk, M Parkin, L Rallidis, J Saramies, B Sennblad, S Shah, G Sigurethsson, A Silveira, G Steinbach, B Thorand, J Trakalo, F Veglia, R Wennauer, W Winckler, D Zabanah, H Campbell, C van Duijn, AG Uitterlinden, A Hofman, E Sijbrands, GR Abecasis, KR Owen, E Zeggini, MD Trip, NG Forouhi, AC Syvanen, JG Eriksson, L Peltonen, MM Nothen, B Balkau, CN Palmer, V Lyssenko, T Tuomi, B Isomaa, DJ Hunter, L Qi, AR Shuldiner, M Roden, I Barroso, T Wilsgaard, J Beilby, K Hovingh, JF Price, JF Wilson, R Rauramaa, TA Lakka, L Lind, G Dedoussis, I Njolstad, NL Pedersen, KT Khaw, NJ Wareham, SM Keinanen-Kiukkaanniemi, TE Saaristo, E Korpi-Hyovalti, J Saltevo, M Laakso, J Kuusisto, A Metspalu, FS Collins, KL Mohlke, RN Bergman, J Tuomilehto, BO Boehm, C Gieger, K Hveem, S Cauchi, P Froguel, D Baldassarre, E Tremoli, SE Humphries, D Saleheen, J Danesh, E Ingelsson, S Ripatti, V Salomaa, R Erbel, KH Jockel, S Moebus, A Peters, T Illig, U de Faire, A Hamsten, AD Morris, PJ Donnelly, TM Frayling, AT Hattersley, E Boerwinkle, O Melander, S Kathiresan, PM Nilsson, P Deloukas, U Thorsteinsdottir, LC Groop, K Stefansson, F Hu, JS Pankow, J Dupuis, JB Meigs, D Altshuler, M Boehnke, and MI McCarthy. Large-scale association analysis provides insights into the genetic architecture and pathophysiology of type 2 diabetes. *Nat Genet*, 44(9):981–990, 2012.
8. Tobacco, Genetics Consortium, et al. Genome-wide meta-analyses identify multiple loci associated with smoking behavior. *Nature genetics*, 42(5):441–447, 2010.
9. John RB Perry, Felix Day, Cathy E Elks, Patrick Sulem, Deborah J Thompson, Teresa Ferreira, Chunyan He, Daniel I Chasman, Tõnu Esko, Gudmar Thorleifsson, et al. Parent-of-origin-specific allelic associations among 106 genomic loci for age at menarche. *Nature*, 514(7520):92–97, 2014.
10. Felix R Day, Katherine S Ruth, Deborah J Thompson, Kathryn L Lunetta, Natalia Pervjakova, Daniel I Chasman, Lisette Stolk, Hilary K Finucane, Patrick Sulem, Brendan Bulik-Sullivan, et al. Large-scale genomic analyses link reproductive aging to hypothalamic signaling, breast cancer susceptibility and brca1-mediated dna repair. *Nature genetics*, 47(11):1294–1303, 2015.
11. Farhad Hormozdiani, Steven Gazal, Bryce van de Geijn, Hilary Finucane, Chelsea J-T Ju, Po-Ru Loh, Armin Schoech, Yakir Reshef, Xuanyao Liu, Luke O'Connor, et al. Leveraging molecular qtl to understand the genetic architecture of diseases and complex traits. *bioRxiv*, page 203380, 2017.
